# Supplementary material
Source: PubMed Central journal article supplement (PMC3170832)
Supplement: NIHMS132258-supplement-1_si_001.pdf [file NIHMS132258-supplement-1_si_001.pdf]

# Cubane-Type Co<sub>4</sub>S<sub>4</sub> Clusters: Synthesis, Redox Series, and Magnetic Ground States

Liang Deng<sup>§</sup>, Eckhard Bill<sup>‡</sup>, Karl Wieghardt<sup>‡</sup> and R. H. Holm<sup>§\*</sup>

*Department of Chemistry and Chemical Biology, Harvard University, Cambridge, Massachusetts 02138 and Max-Planck-Institut für Bioanorganische Chemie, Mulheim an der*

*Ruhr, Germany*

E-mail: holm@chemistry.harvard.edu

## Supporting Information

Figure S-1: Magnetic data for [Co(Pr<sup>*i*</sup><sub>2</sub>NH<sub>2</sub>Me<sub>2</sub>)<sub>2</sub>(S<sup>*t*</sup>Bu)<sub>2</sub>] (**1**).

Figure S-2: Magnetic data for [Co(Pr<sup>*i*</sup><sub>2</sub>NH<sub>2</sub>Me<sub>2</sub>)<sub>2</sub>Cl<sub>2</sub>] (**2**).

Figure S-3: Energy levels and Boltzmann population for [Co<sub>4</sub>S<sub>4</sub>(Pr<sup>*i*</sup><sub>2</sub>NH<sub>2</sub>Me<sub>2</sub>)<sub>4</sub>] (**5**).

Figure S-4: Structure depiction for [Co<sub>8</sub>S<sub>8</sub>(PPr<sup>*i*</sup><sub>3</sub>)<sub>6</sub>] (**7**) and [Co<sub>8</sub>S<sub>8</sub>(PPr<sup>*i*</sup><sub>3</sub>)<sub>6</sub>]<sup>1+</sup> (**8**).

Table S-1. Crystal Data and Summary of Data Collection and Refinement for **1**, **3**, [**4**](BF<sub>4</sub>), **5**, [**6**](BPh<sub>4</sub>), **7**, and [**8**](BF<sub>4</sub>).

Table S-2. Selected Interatomic Distances (Å) and Angles (deg) of [Co<sub>4</sub>S<sub>4</sub>(PPr<sup>*i*</sup><sub>3</sub>)<sub>4</sub>] and [Co<sub>4</sub>S<sub>4</sub>(Pr<sup>*i*</sup><sub>2</sub>NH<sub>2</sub>Me<sub>2</sub>)<sub>4</sub>].

Table S-3. Selected Interatomic Distances (Å) and Angles (deg) of [Co<sub>4</sub>S<sub>4</sub>(PPr<sup>*i*</sup><sub>3</sub>)<sub>4</sub>]<sup>1+</sup> and [Co<sub>4</sub>S<sub>4</sub>(Pr<sup>*i*</sup><sub>2</sub>NH<sub>2</sub>Me<sub>2</sub>)<sub>4</sub>]<sup>1+</sup>.

**Figure S-1:** (A) Temperature dependence of the effective magnetic moment, and (B) multi-field variable temperature measurement of  $[\text{Co}(\text{Pr}^{\text{f}}_2\text{NHCMe}_2)_2(\text{SBU}^{\text{f}})_2]$  (**1**). The lines in (A) are spin Hamiltonian simulations for  $S = 3/2$  with the following parameters: (A)  $g_{\text{Co}} = 2.186$ ,  $D_{\text{Co}} = 0$ , and  $\Theta_{\text{W}} = 0.8$  K. (B): The Brillouin function for  $S = 3/2$  calculated with  $g_{\text{Co}} = 2.$ ,  $D_{\text{Co}} = 0$ ,  $\Theta_{\text{W}} = 0$ .

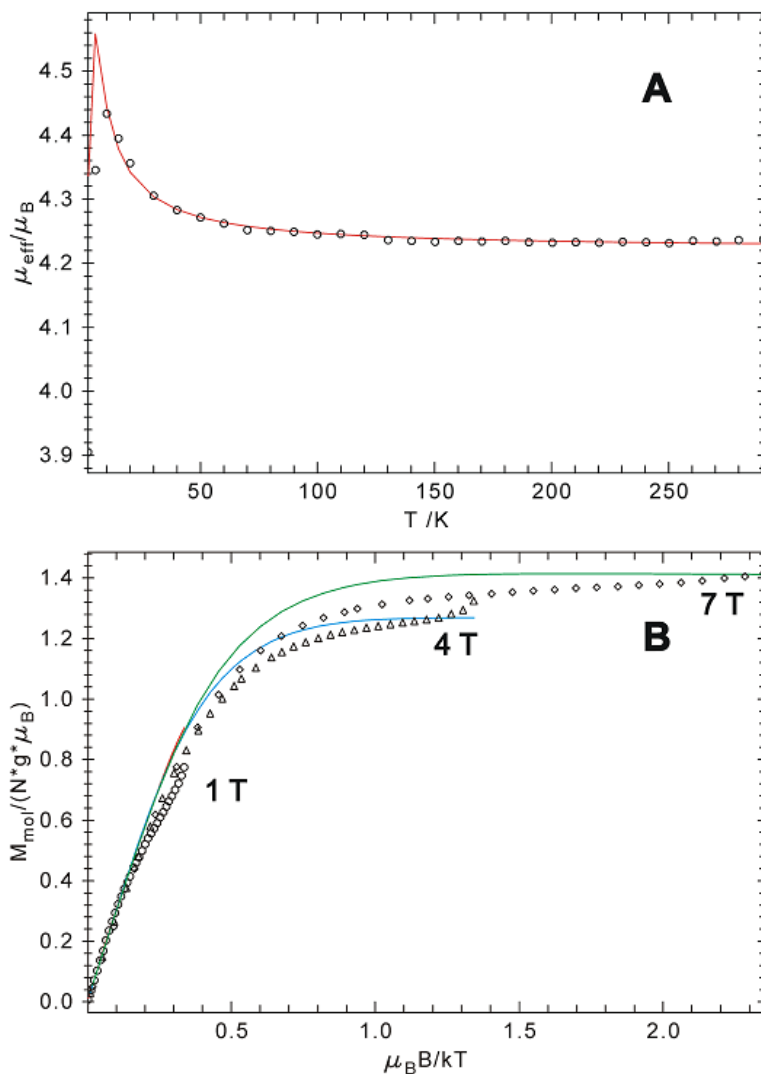

**Figure S-2:**

(A) Temperature dependence of the effective magnetic moment, and (B) multi-field variable temperature measurement of  $[\text{Co}(\text{Pr}^i_2\text{NHCM}_e_2)_2\text{Cl}_2]$  (**2**). The lines are spin Hamiltonian simulations for  $S = 3/2$  with parameters for (A):  $g_{\text{Co}} = 2.18$ ,  $D_{\text{Co}} = 2.3 \text{ cm}^{-1}$ , and  $\Theta_W = 0.7 \text{ K}$ . (B):  $g = 2.18$ ,  $D_{\text{Co}} = 4.3 \text{ cm}^{-1}$ , and  $\Theta_W = 1.0 \text{ K}$ . The values of  $D_{\text{Co}}$  and  $\Theta_W$  in (B) are optimized independently from those in (A).



**Figure S-3.** (A) Energies of the four total-spin manifolds for  $[\text{Co}_4\text{S}_4(\text{Pr}^i_2\text{NHCMe}_2)_4]$  (**5**) as function of an applied field, and calculated with the parameter used for the simulation in Figure 8 ( $S_i = 3/2$ ,  $i = 1-4$ ;  $J = -420 \text{ cm}^{-1}$ ,  $J' = -100 \text{ cm}^{-1}$ ,  $g_1 = 2.17$ ,  $g_{2-4} = 2.0$ ,  $D_i = 0$ ). (B) Boltzmann population of the lowest level as function of temperature.

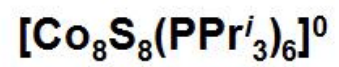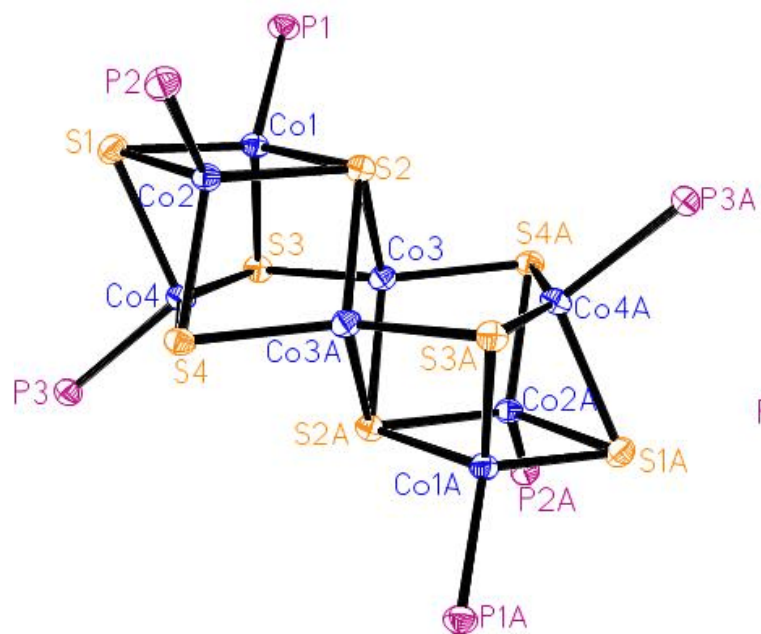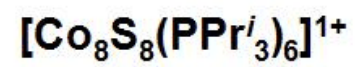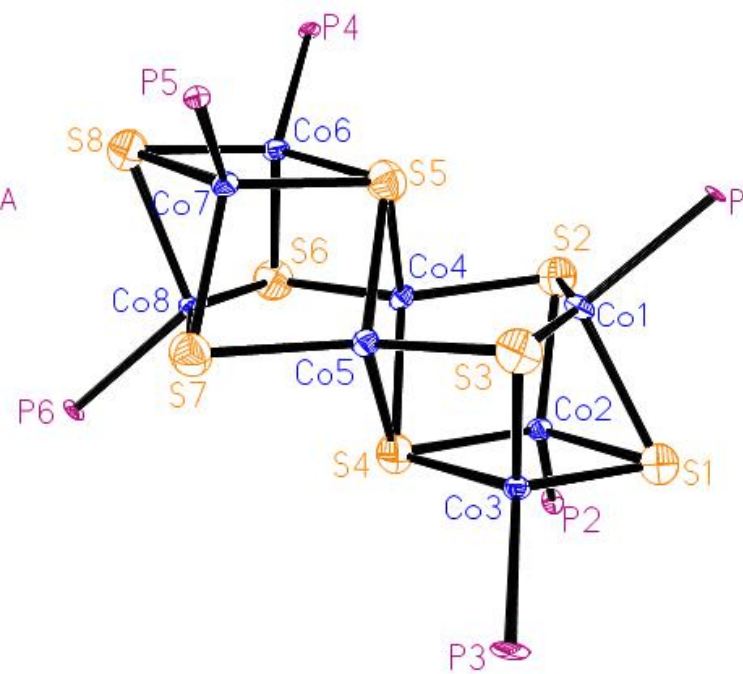

**Figure S-4:** Molecular structures of  $[\text{Co}_8\text{S}_8(\text{PPr}^i_3)_6]$  (**7**) and  $[\text{Co}_8\text{S}_8(\text{PPr}^i_3)_6]^{1+}$  (**8**). Isopropyl groups are omitted for clarity

**Table S-1.** Crystal Data and Summary of Data Collection and Refinement for **1**, **3**, **[4]**(BF<sub>4</sub>), **5**, **[6]**(BPh<sub>4</sub>), **7**, and **[8]**(BF<sub>4</sub>).<sup>a,b</sup>

|                                        | <b>1</b>                                                            | <b>3</b>                                                                         | <b>[4]</b> (BF <sub>4</sub> )                                                                    | <b>5</b>                                                                         | <b>[6]</b> (BPh <sub>4</sub> )                                                      | <b>7</b>                                                                          | <b>[8]</b> (BF <sub>4</sub> )                                                                      |
|----------------------------------------|---------------------------------------------------------------------|----------------------------------------------------------------------------------|--------------------------------------------------------------------------------------------------|----------------------------------------------------------------------------------|-------------------------------------------------------------------------------------|-----------------------------------------------------------------------------------|----------------------------------------------------------------------------------------------------|
| formula                                | C <sub>30</sub> H <sub>58</sub> Co<br>N <sub>4</sub> S <sub>2</sub> | C <sub>36</sub> H <sub>84</sub> Co <sub>4</sub><br>P <sub>4</sub> S <sub>4</sub> | C <sub>36</sub> H <sub>84</sub> BCo <sub>4</sub><br>F <sub>4</sub> P <sub>4</sub> S <sub>4</sub> | C <sub>44</sub> H <sub>80</sub> Co <sub>4</sub><br>N <sub>8</sub> S <sub>4</sub> | C <sub>68</sub> H <sub>100</sub> B<br>CO <sub>4</sub> N <sub>8</sub> S <sub>4</sub> | C <sub>54</sub> H <sub>126</sub> Co <sub>8</sub> P <sub>6</sub><br>S <sub>8</sub> | C <sub>54</sub> H <sub>126</sub> B<br>Co <sub>8</sub> F <sub>4</sub> P <sub>6</sub> S <sub>8</sub> |
| fw                                     | 597.85                                                              | 990.76                                                                           | 1091.68                                                                                          | 1085.12                                                                          | 1404.33                                                                             | 1689.29                                                                           | 1776.10                                                                                            |
| T, K                                   | 193(2)                                                              | 130(2)                                                                           | 193(2)                                                                                           | 105(2)                                                                           | 100(2)                                                                              | 193(2)                                                                            | 193(2)                                                                                             |
| crystal system                         | triclinic                                                           | monoclinic                                                                       | orthorhombic                                                                                     | monoclinic                                                                       | triclinic                                                                           | triclinic                                                                         | triclinic                                                                                          |
| space group                            | <i>P1</i>                                                           | <i>C2/c</i>                                                                      | <i>I-42m</i>                                                                                     | <i>Cc</i>                                                                        | <i>P-1</i>                                                                          | <i>P-1</i>                                                                        | <i>P-1</i>                                                                                         |
| a, Å                                   | 9.890(1)                                                            | 19.057(3)                                                                        | 12.442(1)                                                                                        | 14.321(3)                                                                        | 9.507(1)                                                                            | 12.3518(6)                                                                        | 13.5596(7)                                                                                         |
| b, Å                                   | 10.303(1)                                                           | 12.780(2)                                                                        | 12.442(1)                                                                                        | 20.380(5)                                                                        | 18.56(1)                                                                            | 12.4877(6)                                                                        | 20.897(1)                                                                                          |
| c, Å                                   | 10.437(1)                                                           | 39.863(6)                                                                        | 16.575(2)                                                                                        | 18.726(4)                                                                        | 20.32(1)                                                                            | 13.9495(7)                                                                        | 41.467(2)                                                                                          |
| α, deg                                 | 106.082(2)                                                          | 90                                                                               | 90                                                                                               | 90                                                                               | 85.581(2)                                                                           | 73.960(1)                                                                         | 86.085(1)                                                                                          |
| β, deg                                 | 99.487(2)                                                           | 92.948(3)                                                                        | 90                                                                                               | 96.093(4)                                                                        | 87.589(3)                                                                           | 84.740(1)                                                                         | 81.220(1)                                                                                          |
| γ, deg                                 | 117.495(2)                                                          | 90                                                                               | 90                                                                                               | 90                                                                               | 88.381(2)                                                                           | 64.229(1)                                                                         | 88.473(1)                                                                                          |
| V, Å <sup>3</sup>                      | 851.3(1)                                                            | 9695(3)                                                                          | 2565.8(4)                                                                                        | 5434(2)                                                                          | 3571(2)                                                                             | 1861.2(2)                                                                         | 11584(1)                                                                                           |
| Z                                      | 1                                                                   | 8                                                                                | 2                                                                                                | 4                                                                                | 2                                                                                   | 1                                                                                 | 6                                                                                                  |
| d <sub>calcd</sub> , g/cm <sup>3</sup> | 1.166                                                               | 1.357                                                                            | 1.413                                                                                            | 1.326                                                                            | 1.306                                                                               | 1.507                                                                             | 1.528                                                                                              |
| 2θ range, deg                          | 4.3 to 50.0                                                         | 2.0-50.0                                                                         | 4.1-50.0                                                                                         | 3.4-50.0                                                                         | 4.0-50.0                                                                            | 3.6-50.0                                                                          | 2.7-50.0                                                                                           |
| GOF (F <sup>2</sup> )                  | 0.937                                                               | 1.070                                                                            | 1.009                                                                                            | 1.027                                                                            | 1.034                                                                               | 1.027                                                                             | 1.047                                                                                              |
| R1 <sup>b</sup>                        | 0.0439, <sup>d</sup><br>0.0520 <sup>e</sup>                         | 0.0749, <sup>d</sup><br>0.0919 <sup>e</sup>                                      | 0.0255, <sup>d</sup><br>0.0260 <sup>e</sup>                                                      | 0.0200, <sup>d</sup><br>0.0205 <sup>e</sup>                                      | 0.0447, <sup>d</sup><br>0.0597 <sup>e</sup>                                         | 0.0344, <sup>d</sup><br>0.0393 <sup>e</sup>                                       | 0.0538, <sup>d</sup><br>0.0785 <sup>e</sup>                                                        |
| wR2 <sup>c</sup>                       | 0.0870, <sup>d</sup><br>0.0913 <sup>e</sup>                         | 0.1981, <sup>d</sup><br>0.2109 <sup>e</sup>                                      | 0.0672, <sup>d</sup><br>0.0677 <sup>e</sup>                                                      | 0.0489, <sup>d</sup><br>0.0492 <sup>e</sup>                                      | 0.1117, <sup>d</sup><br>0.1215 <sup>e</sup>                                         | 0.0893, <sup>d</sup><br>0.0940 <sup>e</sup>                                       | 0.1430, <sup>d</sup><br>0.1589 <sup>e</sup>                                                        |

<sup>a</sup> Collected using Mo Kα radiation (λ = 0.71073 Å). <sup>b</sup> R1 = Σ[(F<sub>o</sub> - F<sub>c</sub>)] / Σ(F<sub>o</sub>). <sup>c</sup> wR2 = {Σ[w(F<sub>o</sub><sup>2</sup> - F<sub>c</sub><sup>2</sup>)<sup>2</sup> / Σ[w(F<sub>o</sub><sup>2</sup>)<sup>2</sup>]}<sup>1/2</sup>. <sup>d</sup> I > 2\_σ(I). <sup>e</sup> All data.



**Table S-2.** Selected Interatomic Distances (Å) and Angles (deg) of [Co<sub>4</sub>S<sub>4</sub>(PPr<sup>i</sup>)<sub>4</sub>] and [Co<sub>4</sub>S<sub>4</sub>(Pr<sup>i</sup><sub>2</sub>NHCMe<sub>2</sub>)<sub>4</sub>]

| <b>[Co<sub>4</sub>S<sub>4</sub>(PPr<sup>i</sup>)<sub>4</sub>]</b>                                         |           |                        |          |         |                     |
|-----------------------------------------------------------------------------------------------------------|-----------|------------------------|----------|---------|---------------------|
| Co1-S1                                                                                                    | 2.223(2)  | Co1-Co2                | 2.618(1) | S-Co-S  | 103.8(1)-106.39(7)  |
| Co1-S2                                                                                                    | 2.229(2)  | Co1-Co3                | 2.604(1) | Co-S-Co | 71.24(6)-72.00(6)   |
| Co1-S3                                                                                                    | 2.232(2)  | Co1-Co4                | 2.604(1) |         |                     |
| Co2-S1                                                                                                    | 2.231(2)  | Co2-Co3                | 2.602(1) |         |                     |
| Co2-S2                                                                                                    | 2.236(2)  | Co2-Co4                | 2.600(1) |         |                     |
| Co2-S4                                                                                                    | 2.233(2)  | Co3-Co4                | 2.592(2) |         |                     |
| Co3-S2                                                                                                    | 2.232(2)  | mean of 6              | 2.603[9] |         |                     |
| Co3-S3                                                                                                    | 2.218(3)  |                        |          |         |                     |
| Co3-S4                                                                                                    | 2.223(2)  | Co2-P2 <sup>a</sup>    | 2.235(2) |         |                     |
| Co4-S1                                                                                                    | 2.220(2)  |                        |          |         |                     |
| Co4-S3                                                                                                    | 2.214(3)  | P2-Co2-S1 <sup>a</sup> | 114.6(1) |         |                     |
| Co4-S4                                                                                                    | 2.210(2)  | P2-Co2-S2              | 112.7(1) |         |                     |
| mean of 122.223[8]                                                                                        |           | P2-Co2-S4              | 112.5(2) |         |                     |
| <b>[Co<sub>4</sub>S<sub>4</sub>(Pr<sup>i</sup><sub>2</sub>NHCMe<sub>2</sub>)<sub>4</sub>]<sup>0</sup></b> |           |                        |          |         |                     |
| Co1-S1                                                                                                    | 2.264(2)  | Co1-Co2                | 2.723(1) | S-Co-S  | 103.17(3)-105.26(3) |
| Co1-S2                                                                                                    | 2.256(1)  | Co1-Co3                | 2.677(1) | Co-S-Co | 72.45(2)-74.13(3)   |
| Co1-S3                                                                                                    | 2.240(1)  | Co1-Co4                | 2.678(1) |         |                     |
| Co2-S1                                                                                                    | 2.253(1)  | Co2-Co3                | 2.711(1) |         |                     |
| Co2-S2                                                                                                    | 2.262(1)  | Co2-Co4                | 2.679(1) |         |                     |
| Co2-S4                                                                                                    | 2.260(1)  | Co3-Co4                | 2.680(1) |         |                     |
| Co3-S1                                                                                                    | 2.250(1)  | mean of 6              | 2.69[2]  |         |                     |
| Co3-S3                                                                                                    | 2.246(1)  |                        |          |         |                     |
| Co3-S4                                                                                                    | 2.245(1)  | Co1-C1                 | 1.988(2) |         |                     |
| Co4-S2                                                                                                    | 2.245(1)  | Co2-C2                 | 2.000(2) |         |                     |
| Co4-S3                                                                                                    | 2.254(1)  | Co3-C3                 | 1.973(2) |         |                     |
| Co4-S4                                                                                                    | 2.274(1)  | Co4-C4                 | 1.979(2) |         |                     |
| mean of 122.25[1]                                                                                         | mean of 4 |                        | 1.99[1]  |         |                     |

<sup>a</sup>Data for non-disordered P2 atom.

**Table S-3.** Selected Interatomic Distances (Å) and Angles (deg) of  $[\text{Co}_4\text{S}_4(\text{PPr}^i_3)_4]^{1+}$  and  $[\text{Co}_4\text{S}_4(\text{Pr}^i_2\text{NHCMe}_2)_4]^{1+}$

| $[\text{Co}_4\text{S}_4(\text{PPr}^i_3)_4]^{1+}$              |          |             |           |                           |
|---------------------------------------------------------------|----------|-------------|-----------|---------------------------|
| Co1-S1                                                        | 2.206(1) | S1-Co1-S1A  | 105.20(4) |                           |
| Co1-S1C                                                       | 2.207(1) | S1-Co1-S1C  | 104.94(3) |                           |
| Co1-Co1A                                                      | 2.612(1) | Co1-S1-Co1C | 72.59(3)  |                           |
| Co1-Co1B                                                      | 2.606(1) | Co1-S1-Co1B | 72.44(3)  |                           |
| Co1-P1                                                        | 2.257(1) | P1-Co1-S1   | 113.18(3) |                           |
|                                                               |          | P1-Co1-S1C  | 114.49(4) |                           |
| $[\text{Co}_4\text{S}_4(\text{Pr}^i_2\text{NHCMe}_2)_4]^{1+}$ |          |             |           |                           |
| Co1-S1                                                        | 2.221(1) | Co1-Co2     | 2.661(1)  | S-Co-S103.09(3)-105.69(3) |
| Co1-S2                                                        | 2.209(1) | Co1-Co3     | 2.682(1)  | Co-S-Co 72.53(3)-74.87(3) |
| Co1-S4                                                        | 2.223(1) | Co1-Co4     | 2.622(1)  |                           |
| Co2-S1                                                        | 2.231(1) | Co2-Co3     | 2.684(1)  |                           |
| Co2-S2                                                        | 2.227(1) | Co2-Co4     | 2.663(1)  |                           |
| Co2-S3                                                        | 2.260(1) | Co3-Co4     | 2.658(1)  |                           |
| Co3-S2                                                        | 2.204(1) | mean of 6   | 2.66[2]   |                           |
| Co3-S3                                                        | 2.232(1) |             |           |                           |
| Co3-S4                                                        | 2.238(1) | Co1-C1      | 1.977(3)  |                           |
| Co4-S1                                                        | 2.204(1) | Co2-C12     | 1.984(3)  |                           |
| Co4-S3                                                        | 2.227(1) | Co3-C23     | 1.984(3)  |                           |
| Co4-S4                                                        | 2.210(1) | Co4-C34     | 1.964(3)  |                           |
| mean of 12                                                    | 2.22[2]  | mean of 4   | 1.977[9]  |                           |
